# Supplementary material for: Effectiveness of acupuncture for breast cancer related lymphedema: protocol for a single-blind, sham-controlled, randomized, multicenter trial
Source: Springer Nature journal article supplement (doi:10.1186/s12906-017-1980-0), 2017-09-21
Supplement: MOESM1 [file 15078872]

## blocked randomized sequences

| block | H1drug    | H1placebo | H2drug    | H2placebo | H3drug    |
|-------|-----------|-----------|-----------|-----------|-----------|
| 1     | patient1  | patient51 | patient1  | patient31 | patient1  |
| 2     | patient2  | patient52 | patient2  | patient32 | patient2  |
| 3     | patient3  | patient53 | patient3  | patient33 | patient3  |
| 4     | patient4  | patient54 | patient4  | patient34 | patient4  |
| 5     | patient5  | patient55 | patient5  | patient35 | patient5  |
| 6     | patient6  | patient56 | patient6  | patient36 | patient6  |
| 7     | patient7  | patient57 | patient7  | patient37 | patient7  |
| 8     | patient8  | patient58 | patient8  | patient38 | patient8  |
| 9     | patient9  | patient59 | patient9  | patient39 | patient9  |
| 10    | patient10 | patient60 | patient10 | patient40 | patient10 |
| 11    | patient11 | patient61 | patient11 | patient41 | patient11 |
| 12    | patient12 | patient62 | patient12 | patient42 | patient12 |
| 13    | patient13 | patient63 | patient13 | patient43 | patient13 |
| 14    | patient14 | patient64 | patient14 | patient44 | patient14 |
| 15    | patient15 | patient65 | patient15 | patient45 | patient15 |
| 16    | patient16 | patient66 | patient16 | patient46 | patient16 |
| 17    | patient17 | patient67 | patient17 | patient47 | patient17 |
| 18    | patient18 | patient68 | patient18 | patient48 | patient18 |
| 19    | patient19 | patient69 | patient19 | patient49 | patient19 |
| 20    | patient20 | patient70 | patient20 | patient50 | patient20 |
| 21    | patient21 | patient71 | patient21 | patient51 |           |
| 22    | patient22 | patient72 | patient22 | patient52 |           |
| 23    | patient23 | patient73 | patient23 | patient53 |           |
| 24    | patient24 | patient74 | patient24 | patient54 |           |
| 25    | patient25 | patient75 | patient25 | patient55 |           |
| 26    | patient26 | patient76 | patient26 | patient56 |           |
| 27    | patient27 | patient77 | patient27 | patient57 |           |
| 28    | patient28 | patient78 | patient28 | patient58 |           |
| 29    | patient29 | patient79 | patient29 | patient59 |           |
| 30    | patient30 | patient80 | patient30 | patient60 |           |
| 31    | patient31 | patient81 |           |           |           |
| 32    | patient32 | patient82 |           |           |           |
| 33    | patient33 | patient83 |           |           |           |
| 34    | patient34 | patient84 |           |           |           |
| 35    | patient35 | patient85 |           |           |           |
| 36    | patient36 | patient86 |           |           |           |
| 37    | patient37 | patient87 |           |           |           |
| 38    | patient38 | patient88 |           |           |           |
| 39    | patient39 | patient89 |           |           |           |
| 40    | patient40 | patient90 |           |           |           |
| 41    | patient41 | patient91 |           |           |           |
| 42    | patient42 | patient92 |           |           |           |
| 43    | patient43 | patient93 |           |           |           |
| 44    | patient44 | patient94 |           |           |           |
| 45    | patient45 | patient95 |           |           |           |

|    |           |            |
|----|-----------|------------|
| 46 | patient46 | patient96  |
| 47 | patient47 | patient97  |
| 48 | patient48 | patient98  |
| 49 | patient49 | patient99  |
| 50 | patient50 | patient100 |



for each center

| H3placebo | block | H1drug   |
|-----------|-------|----------|
| patient21 | 1     | 0.640854 |
| patient22 | 2     | 0.133341 |
| patient23 | 3     | 0.573766 |
| patient24 | 4     | 0.602637 |
| patient25 | 5     | 0.222746 |
| patient26 | 6     | 0.340253 |
| patient27 | 7     | 0.582022 |
| patient28 | 8     | 0.318505 |
| patient29 | 9     | 0.818318 |
| patient30 | 10    | 0.577358 |
| patient31 | 11    | 0.231453 |
| patient32 | 12    | 0.028151 |
| patient33 | 13    | 0.917096 |
| patient34 | 14    | 0.120143 |
| patient35 | 15    | 0.84058  |
| patient36 | 16    | 0.60043  |
| patient37 | 17    | 0.499425 |
| patient38 | 18    | 0.827796 |
| patient39 | 19    | 0.731476 |
| patient40 | 20    | 0.37695  |
|           | 21    | 0.437036 |
|           | 22    | 0.09581  |
|           | 23    | 0.847918 |
|           | 24    | 0.161381 |
|           | 25    | 0.089586 |
|           | 26    | 0.031353 |
|           | 27    | 0.951511 |
|           | 28    | 0.223968 |
|           | 29    | 0.890443 |
|           | 30    | 0.972668 |
|           | 31    | 0.086006 |
|           | 32    | 0.349086 |
|           | 33    | 0.133338 |
|           | 34    | 0.210987 |
|           | 35    | 0.455304 |
|           | 36    | 0.24294  |
|           | 37    | 0.373177 |
|           | 38    | 0.623155 |
|           | 39    | 0.787131 |
|           | 40    | 0.984235 |
|           | 41    | 0.488521 |
|           | 42    | 0.970328 |
|           | 43    | 0.192582 |
|           | 44    | 0.386701 |
|           | 45    | 0.771794 |

46 0.612875  
47 0.614744  
48 0.035496  
49 0.438098  
50 0.119862



| H1placebc | H2drug    | H2placebo  | H3drug   | H3placebc |
|-----------|-----------|------------|----------|-----------|
| 0.681207  | 0.5098091 | 0.44557243 | 0.539607 | 0.369211  |
| 0.974534  | 0.4799152 | 0.93243627 | 0.305467 | 0.364253  |
| 0.041139  | 0.5440746 | 0.87855879 | 0.766835 | 0.178081  |
| 0.630917  | 0.534319  | 0.75465993 | 0.159177 | 0.219025  |
| 0.805618  | 0.9934661 | 0.62301267 | 0.57673  | 0.404981  |
| 0.175434  | 0.4430549 | 0.66072122 | 0.668683 | 0.012413  |
| 0.152994  | 0.7763599 | 0.66528533 | 0.663097 | 0.200991  |
| 0.190447  | 0.0416188 | 0.64837889 | 0.102505 | 0.355893  |
| 0.57734   | 0.129913  | 0.67430286 | 0.255981 | 0.657141  |
| 0.503883  | 0.09593   | 0.52642964 | 0.818556 | 0.869616  |
| 0.339943  | 0.3625454 | 0.30901708 | 0.601786 | 0.425847  |
| 0.243818  | 0.0113642 | 0.99144436 | 0.161184 | 0.202428  |
| 0.270875  | 0.1378983 | 0.63270326 | 0.973782 | 0.478585  |
| 0.115145  | 0.040542  | 0.82352068 | 0.643616 | 0.852982  |
| 0.991579  | 0.7478636 | 0.7044557  | 0.342858 | 0.872994  |
| 0.966187  | 0.3144253 | 0.57020803 | 0.596181 | 0.530187  |
| 0.529956  | 0.9196597 | 0.17826522 | 0.860194 | 0.860685  |
| 0.617708  | 0.3363565 | 0.1327754  | 0.965232 | 0.595584  |
| 0.711228  | 0.7502866 | 0.05283374 | 0.023442 | 0.702329  |
| 0.383924  | 0.3494753 | 0.2338307  | 0.167245 | 0.196533  |
| 0.16088   | 0.9579126 | 0.5986318  |          |           |
| 0.263016  | 0.7578469 | 0.17086534 |          |           |
| 0.587297  | 0.5439127 | 0.71140662 |          |           |
| 0.352174  | 0.9983957 | 0.41554913 |          |           |
| 0.899424  | 0.7083094 | 0.31228424 |          |           |
| 0.83892   | 0.6008364 | 0.72175337 |          |           |
| 0.797339  | 0.2380245 | 0.80170903 |          |           |
| 0.442233  | 0.7982424 | 0.48826515 |          |           |
| 0.696708  | 0.2089221 | 0.89256853 |          |           |
| 0.496395  | 0.515632  | 0.85828318 |          |           |
| 0.770796  |           |            |          |           |
| 0.97069   |           |            |          |           |
| 0.278806  |           |            |          |           |
| 0.960861  |           |            |          |           |
| 0.410887  |           |            |          |           |
| 0.442183  |           |            |          |           |
| 0.573721  |           |            |          |           |
| 0.673491  |           |            |          |           |
| 0.784517  |           |            |          |           |
| 0.407387  |           |            |          |           |
| 0.398122  |           |            |          |           |
| 0.084258  |           |            |          |           |
| 0.109283  |           |            |          |           |
| 0.665438  |           |            |          |           |
| 0.122542  |           |            |          |           |

0.812396  
0.429035  
0.740373  
0.477781  
0.966486





| block | 1 | 2 | 3 | 4 | 5 | 6 |
|-------|---|---|---|---|---|---|
| 1     | 2 | 1 | 4 | 5 | 3 | 6 |
| 2     | 6 | 1 | 3 | 2 | 5 | 4 |
| 3     | 3 | 6 | 4 | 1 | 2 | 5 |
| 4     | 3 | 2 | 4 | 1 | 6 | 5 |
| 5     | 6 | 2 | 1 | 3 | 4 | 5 |
| 6     | 4 | 5 | 3 | 2 | 1 | 6 |
| 7     | 4 | 6 | 1 | 2 | 3 | 5 |
| 8     | 3 | 4 | 6 | 1 | 5 | 2 |
| 9     | 1 | 4 | 6 | 2 | 5 | 3 |
| 10    | 3 | 5 | 6 | 4 | 2 | 1 |
| 11    | 6 | 4 | 3 | 5 | 1 | 2 |
| 12    | 5 | 2 | 6 | 1 | 4 | 3 |
| 13    | 2 | 5 | 6 | 3 | 1 | 4 |
| 14    | 4 | 5 | 6 | 2 | 3 | 1 |
| 15    | 3 | 1 | 4 | 5 | 6 | 2 |
| 16    | 2 | 1 | 6 | 4 | 3 | 5 |
| 17    | 5 | 4 | 1 | 6 | 3 | 2 |
| 18    | 2 | 3 | 5 | 6 | 1 | 4 |
| 19    | 2 | 3 | 1 | 5 | 6 | 4 |
| 20    | 2 | 1 | 3 | 4 | 6 | 5 |
| 21    | 3 | 4 | 1 | 2 |   |   |
| 22    | 4 | 2 | 1 | 3 |   |   |
| 23    | 1 | 3 | 4 | 2 |   |   |
| 24    | 4 | 3 | 1 | 2 |   |   |
| 25    | 4 | 1 | 2 | 3 |   |   |
| 26    | 4 | 1 | 3 | 2 |   |   |
| 27    | 1 | 3 | 4 | 2 |   |   |
| 28    | 4 | 3 | 1 | 2 |   |   |
| 29    | 2 | 3 | 4 | 1 |   |   |
| 30    | 1 | 4 | 3 | 2 |   |   |
| 31    | 2 | 1 |   |   |   |   |
| 32    | 2 | 1 |   |   |   |   |
| 33    | 2 | 1 |   |   |   |   |
| 34    | 2 | 1 |   |   |   |   |
| 35    | 1 | 2 |   |   |   |   |
| 36    | 2 | 1 |   |   |   |   |
| 37    | 2 | 1 |   |   |   |   |
| 38    | 2 | 1 |   |   |   |   |
| 39    | 1 | 2 |   |   |   |   |
| 40    | 1 | 2 |   |   |   |   |
| 41    | 1 | 2 |   |   |   |   |
| 42    | 1 | 2 |   |   |   |   |
| 43    | 1 | 2 |   |   |   |   |
| 44    | 2 | 1 |   |   |   |   |
| 45    | 1 | 2 |   |   |   |   |

|    |   |   |
|----|---|---|
| 46 | 2 | 1 |
| 47 | 1 | 2 |
| 48 | 2 | 1 |
| 49 | 2 | 1 |
| 50 | 2 | 1 |
