# Supplementary material for: Effectiveness of acupuncture for breast cancer related lymphedema: protocol for a single-blind, sham-controlled, randomized, multicenter trial
Source: Springer Nature journal article supplement (doi:10.1186/s12906-017-1980-0), 2017-09-21
Supplement: MOESM2 [file 15078872]

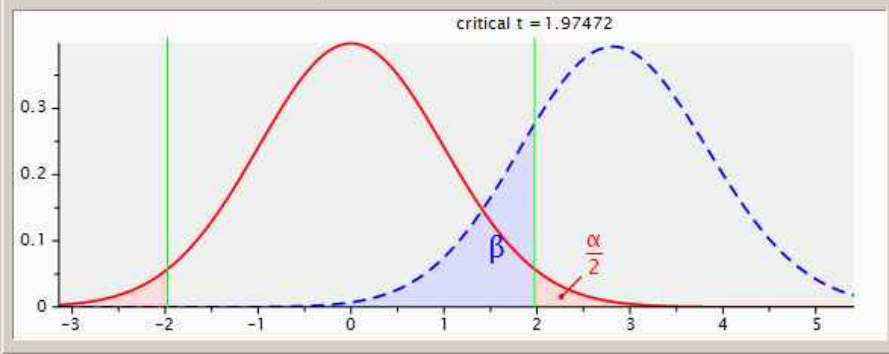

Test family: **t tests**

Statistical test: **Means: Difference between two independent means (two groups)**

Type of power analysis: **A priori: Compute required sample size - given alpha, power, and effect size**

Input Parameters

Tail(s): **Two**

Determine => Effect size d: **0.4417261**

alpha err prob: **0.05**

Power (1 - beta err prob): **0.8**

Allocation ratio N2 / N1: **1**

Output Parameters

Noncentrality parameter delta: **2.8284271**

Critical t: **1.9747158**

Df: **162**

Sample size group 1: **82**

Sample size group 2: **82**

Total sample size: **164**

Actual power: **0.8027989**

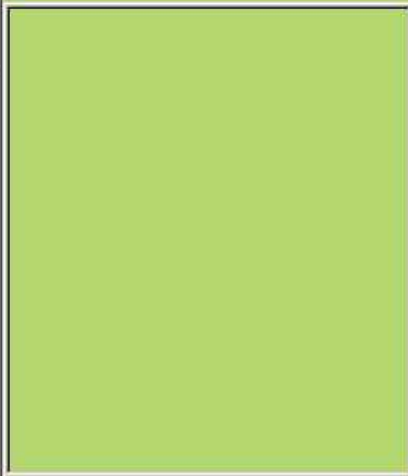

n1 != n2

Mean group 1:

Mean group 2:

SD sigma within each group:

n1 = n2

Mean group 1:

Mean group 2:

SD sigma group 1:

SD sigma group 2:

Calculate | Effect size d:

Calculate and transfer to main window

Close
